# Supplementary material for: Maize ZmRACK1 Is Involved in the Plant Response to Fungal Phytopathogens
Source: Int J Mol Sci. 2014 May 26;15(6):9343–59. doi: 10.3390/ijms15069343 (PMC4100098; doi:10.3390/ijms15069343)
Supplement: Supplementary File 1 — Supplementary Information (PDF, 569 KB) [file ijms-15-09343-s001.pdf]

## Supplementary Information

**Figure S1.** Multiple amino acid sequence alignment of some WD40-repeat proteins. Amino acids that are identical or similar are shaded in black or gray, respectively. Gaps are shown as dashed lines. The proteins aligned are ArcA (*Nicotiana tabacum*, D17526), AtArcA (*Arabidopsis thaliana*, U77381), RACK1 (*Homo sapiens*, BC035460), OsRACK1 (*Oryza sativa*, D38231) and ZmRACK1 (*Zea mays*). The positions of GH and WD dipeptides in each WD40 repeat are indicated by triangles and asterisks, respectively, below the residues. Two internal sequences representing the PKC binding domains are underlined. The amino acid sequences were aligned using the CLUSTALW multiple alignment tool of the BioEdit Sequence Alignment Editor: <http://www.mbio.ncsu.edu/BioEdit/bioedit.html>.

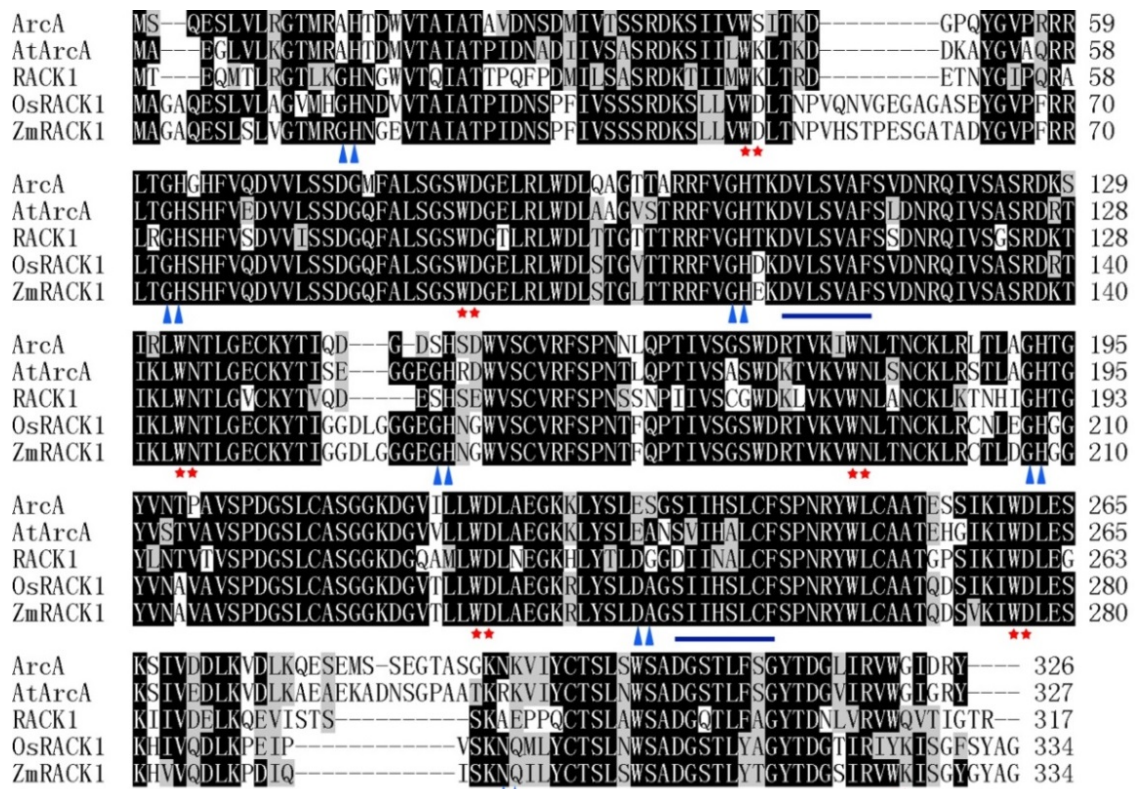

**Table S1.** Oligonucleotides primers used for various gene constructs and PCR.

| Oligo names primer sequences                    |                                            | Features                |
|-------------------------------------------------|--------------------------------------------|-------------------------|
| Primers for <i>ZmRACK1</i>                      |                                            |                         |
| RK1                                             | 5'-AATCCCTCACAGCAACCAT-3'                  |                         |
| RK2                                             | 5'-TCGACATCTAGCCTGCGTA-3'                  |                         |
| RKr5                                            | 5'- GATGGATCGCTCTGCGCC-3'                  | For real-time PCR       |
| RKr3                                            | 5'-TAGCGGTTGGGCGAGAAGC-3'                  | For real-time PCR       |
| Primers for maize <i>tubulin</i>                |                                            |                         |
| Tu5                                             | 5'-AACTGGGACGATATGGAGAA-3'                 | For real-time PCR       |
| Tu3                                             | 5'-CACTGGCGTATAGGGACAAC-3'                 | For real-time PCR       |
| Primers for pathogenesis-related genes of maize |                                            |                         |
| PR1-5                                           | 5'-CCTGGGTGTCCGAGAAGCA-3'                  | For real-time PCR       |
| PR1-3                                           | 5'-ACAGCCGATGGCGGTGGAGT-3'                 | For real-time PCR       |
| PR5-5                                           | 5'-CGGCAGCCAGGACTTCTA-3'                   | For real-time PCR       |
| PR5-3                                           | 5'-GCCACAGGCATGGGTCT-3'                    | For real-time PCR       |
| Primers used in yeast two hybrid                |                                            |                         |
| RAC5                                            | 5'-CGGCAGTGAGAGCGATG-3'                    |                         |
| RAC3                                            | 5'-AAGAGTCTGTGCTTTACG-3'                   |                         |
| mRAC5                                           | 5'-ATGAGCGCGGCGGCGGCG-3'                   |                         |
| mRAC3                                           | 5'-TTACGATGTGAAAGATCCGCTTCCACTGA-3'        |                         |
| SGT5                                            | 5'-TCTCGCCCAAGTCATCGT-3'                   |                         |
| SGT3                                            | 5'-ACGGCAAGTAGCACTCAGACAC-3'               |                         |
| RAR5                                            | 5'-ATGTCAACGACGACGGAGGC-3'                 |                         |
| RAR3                                            | 5'-TCACACCGCATCAGCATTATG-3'                |                         |
| Primers for gfp                                 |                                            |                         |
| pG1                                             | 5'- <u>CCCCCGGG</u> ATGAGTAAAGGAGAAGAA-3'  | <i>Sma</i> I underlined |
| pG2                                             | 5'-GCG <u>GAGCTCT</u> TATTTGTATAGTTCATC-3' | <i>Sac</i> I underlined |
